# Supplementary material for: Ecological immunology in a fluctuating environment: an integrative analysis of tree swallow nestling immune defense
Source: PubMed Central journal article supplement (PMC3631416; doi:10.1002/ece3.504), 2013-03-09
Supplement: ece30003-1091-SD1.pdf [file ece30003-1091-SD1.pdf]

# Supplementary material

## For

### Ecological immunology in a fluctuating environment: an integrative analysis to tree swallow nestlings immune responses

Gabriel Pigeon, Marc Bélisle, Dany Garant, Alan A.Cohen and Fanie Pelletier

**Table S1:** Eigenvalues of the redundancy analysis for the pooled value.

|      | Eigenvalue | Proportion Explained |
|------|------------|----------------------|
| RDA1 | 0.755      | 0.151                |
| RDA2 | 0.155      | 0.031                |
| RDA3 | 0.022      | 0.004                |
| PC1  | 1.124      | 0.225                |
| PC2  | 0.918      | 0.184                |
| PC3  | 0.874      | 0.175                |
| PC4  | 0.646      | 0.129                |
| PC5  | 0.507      | 0.507                |

**Table S2:** Eigenvalues and loading values of the principal component analysis for the four sub-groups.

| <b>Sub-group</b>  | <b>Immune indices</b> | <b>Comp 1</b> | <b>Comp 2</b> | <b>Comp 3</b> | <b>Comp 4</b> | <b>Comp 5</b> |
|-------------------|-----------------------|---------------|---------------|---------------|---------------|---------------|
| Extensive<br>2010 | Eigenvalue            | 1.296         | 1.123         | 1.046         | 0.826         | 0.71          |
|                   | PHA                   | -0.033        | 0.713         | 0.483         | 0.445         | -0.243        |
|                   | B. killing            | 0.759         | 0.155         | -0.144        | 0.314         | 0.529         |
|                   | Hemolysis             | 0.598         | 0.453         | -0.085        | -0.600        | -0.263        |
|                   | Agglutination         | -0.127        | 0.251         | -0.879        | 0.288         | -0.256        |
|                   | % Lymphocyte          | -0.587        | 0.567         | -0.110        | -0.293        | 0.485         |
| Extensive<br>2011 | Eigenvalue            | 1.747         | 1.104         | 0.879         | 0.798         | 0.472         |
|                   | PHA                   | -0.059        | 0.793         | 0.551         | -0.246        | -0.057        |
|                   | B. killing            | 0.756         | 0.181         | -0.270        | -0.377        | 0.425         |
|                   | Hemolysis             | 0.359         | -0.601        | 0.697         | -0.074        | 0.136         |
|                   | Agglutination         | 0.838         | -0.047        | -0.083        | -0.168        | -0.511        |
|                   | % Lymphocyte          | 0.584         | 0.282         | 0.096         | 0.750         | 0.093         |
| Intensive<br>2010 | Eigenvalue            | 1.703         | 1.159         | 0.953         | 0.728         | 0.457         |
|                   | PHA                   | -0.422        | 0.778         | -0.193        | -0.268        | -0.328        |
|                   | B. killing            | 0.832         | -0.243        | 0.020         | -0.044        | -0.496        |
|                   | Hemolysis             | 0.687         | 0.320         | 0.216         | -0.548        | 0.282         |
|                   | Agglutination         | 0.401         | 0.080         | -0.897        | 0.091         | 0.143         |
|                   | % Lymphocyte          | -0.448        | -0.621        | -0.254        | -0.588        | -0.054        |
| Intensive<br>2011 | Eigenvalue            | 1.871         | 1.117         | 0.944         | 0.698         | 0.369         |
|                   | PHA                   | -0.352        | -0.420        | 0.792         | 0.258         | -0.077        |
|                   | B. killing            | 0.823         | 0.166         | 0.325         | 0.090         | 0.425         |
|                   | Hemolysis             | -0.360        | 0.680         | 0.427         | -0.474        | -0.025        |
|                   | Agglutination         | 0.807         | 0.337         | 0.137         | 0.207         | -0.416        |
|                   | % Lymphocyte          | 0.537         | -0.580        | 0.100         | -0.597        | -0.094        |

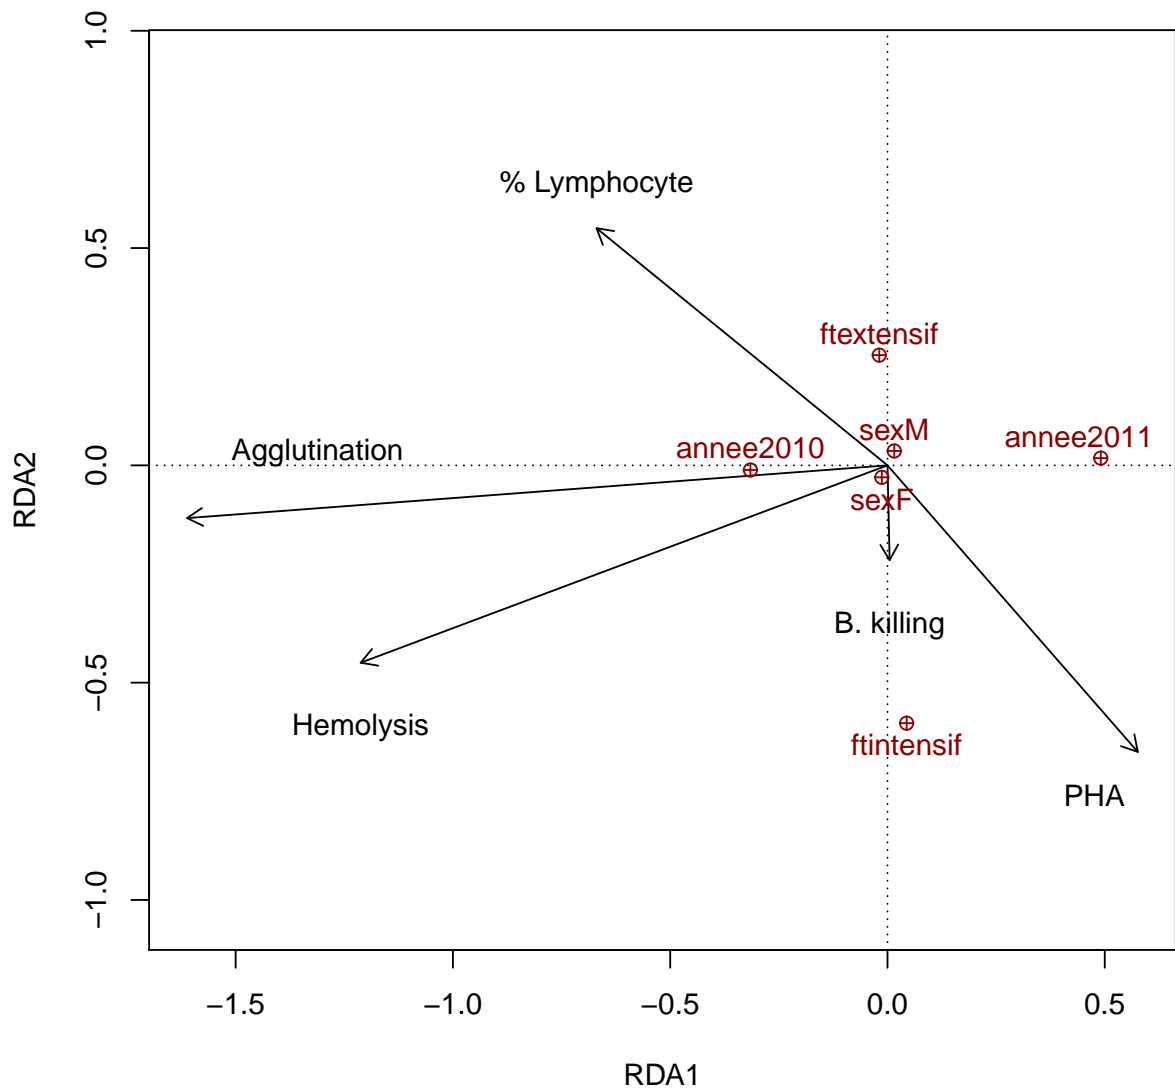

**Figure S1:** Redundancy analysis of pooled nestlings immune measurements with year, farm type and sex as constraining variables. Arrows represent loading values of the different immune measures. Red circles represent centroids of constraining variables. 20.37% of the variance is explained by RDA 1 and 2. n=210.

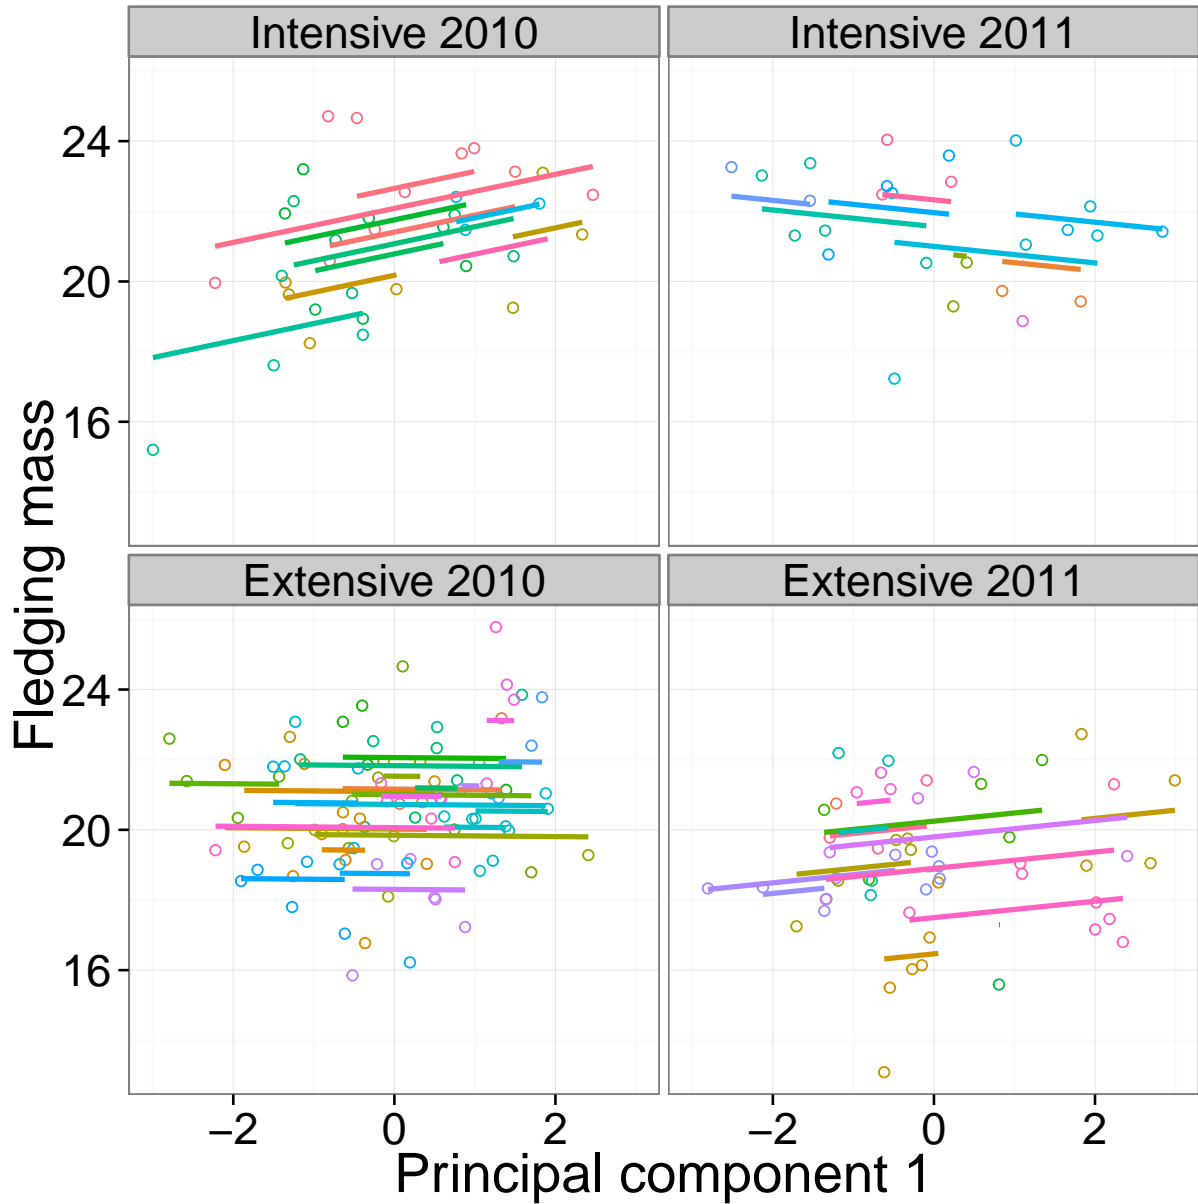

**Figure S2:** Relationship between PC1 and mass at fledging of tree swallow nestlings. Regression lines are obtained from linear mixed model (LME) and represent the regression with a random intercept by nest-boxes. The contribution to PC1 of each immune marker by sub-group is equal to the horizontal loading displayed in Figure 2.

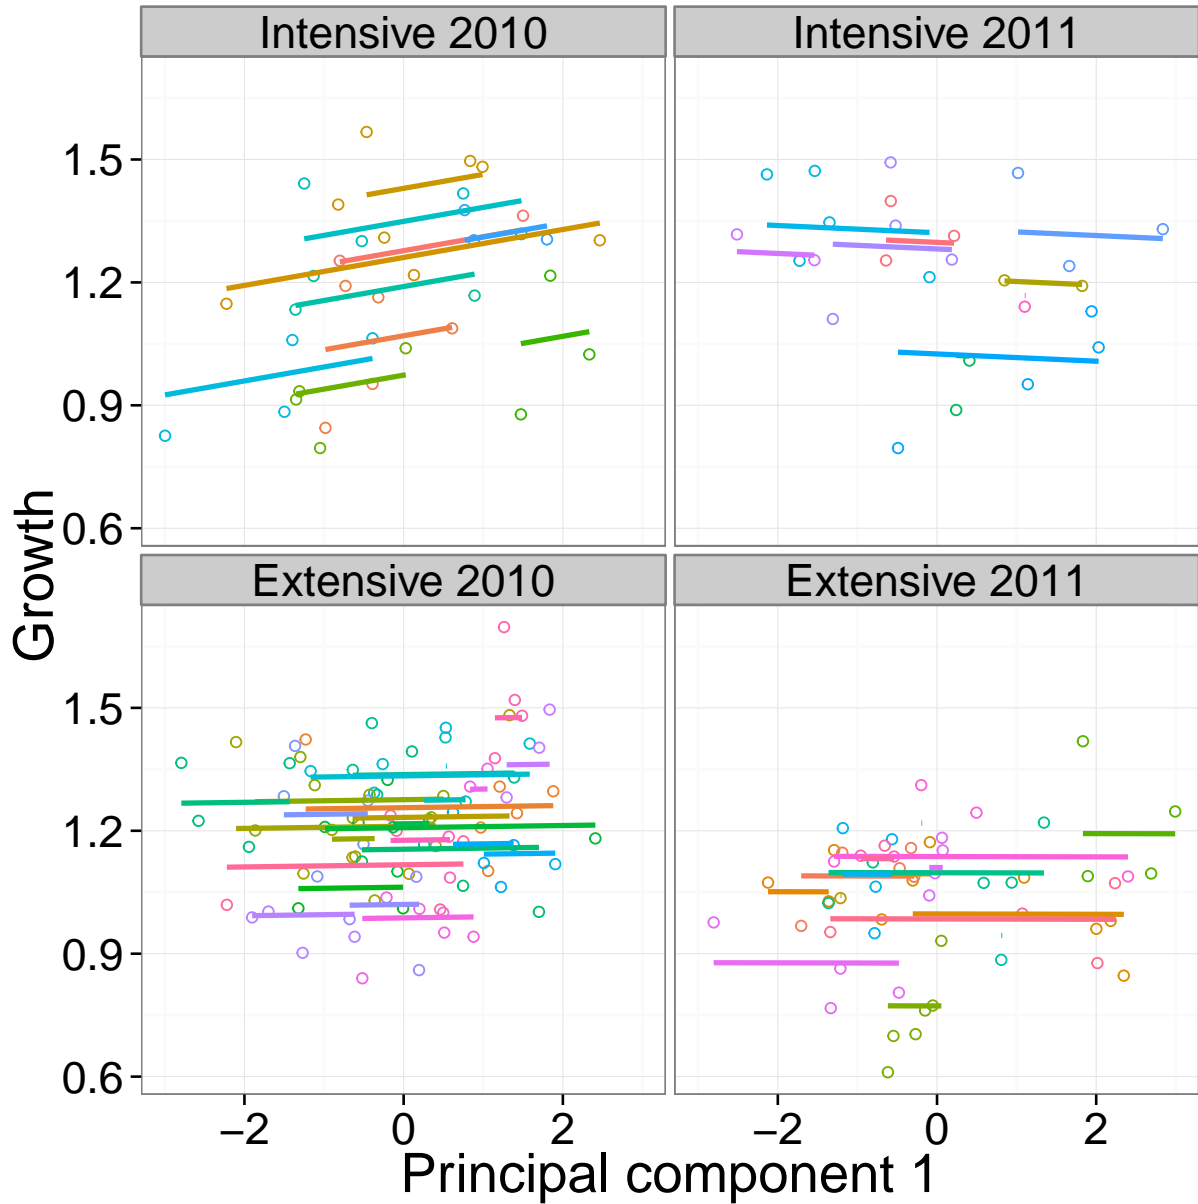

**Figure S3:** Relationship between PC1 and growth of tree swallow nestlings. Regression lines are obtained from linear mixed model (LME) and represent the regression with a random intercept by nest-boxes. The contribution to PC1 of each immune marker by sub-group is equal to the horizontal loading displayed in Figure 2.

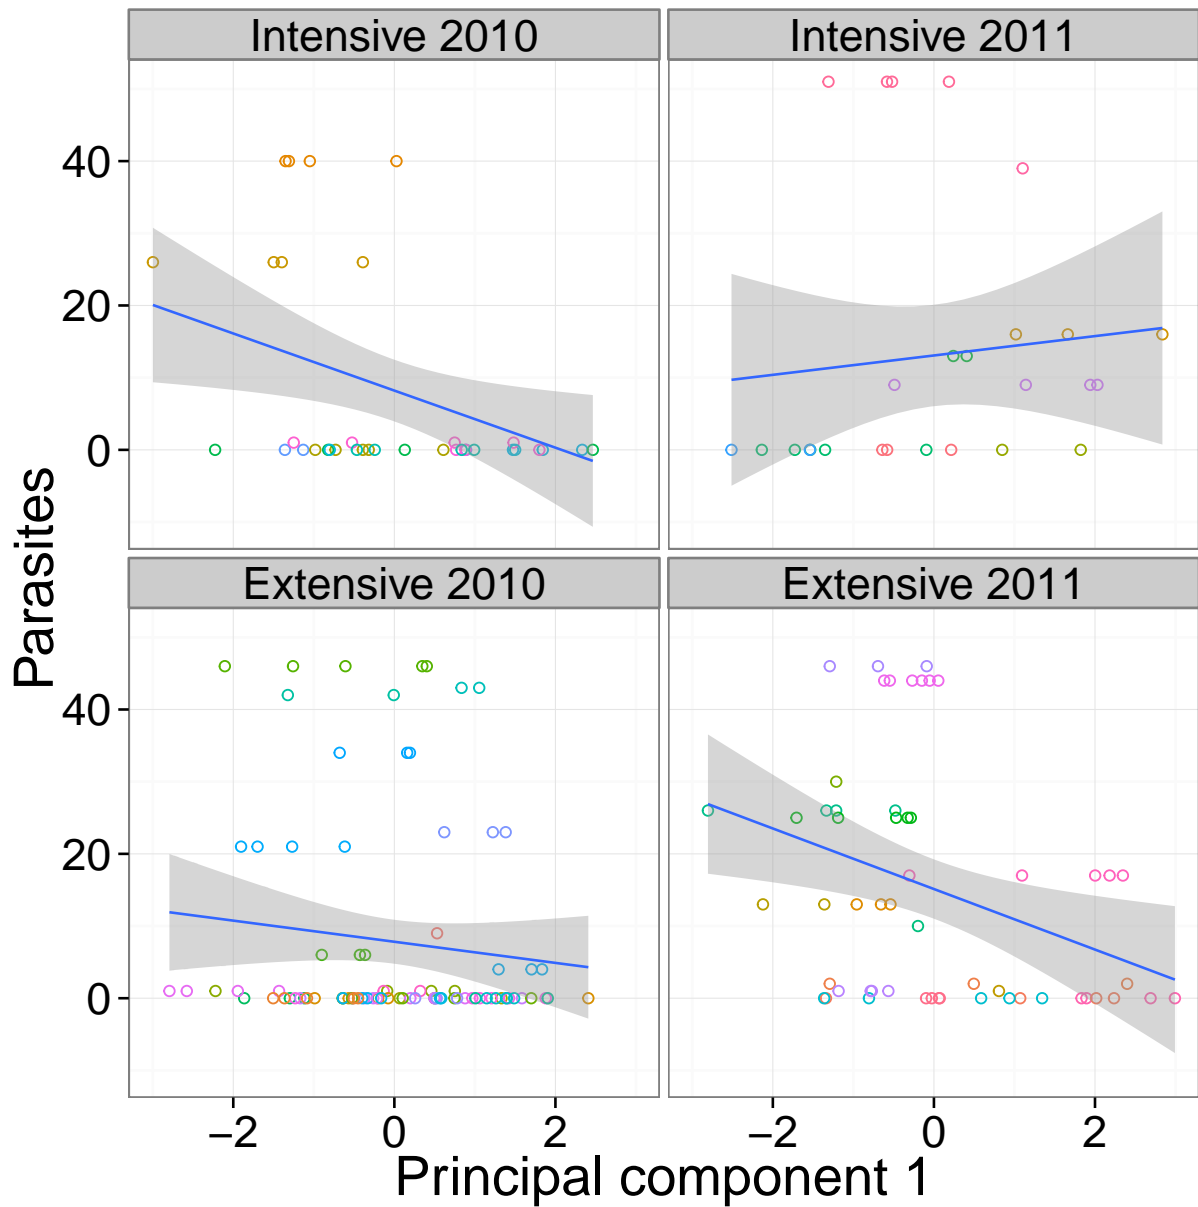

**Figure S4:** Relationship between PC1 and parasite burden of tree swallow nestlings. Regression lines are obtained from linear model. The contribution to PC1 of each immune marker by subgroup is equal to the horizontal loading displayed in Figure 2. Grey area represents confidence interval.
